# Supplementary material
Source: PubMed Central journal article supplement (PMC4066975)
Supplement: NIHMS574706-supplement-Supplementary_Appendix.pdf [file NIHMS574706-supplement-Supplementary_Appendix.pdf]

1  
2  
3  
4  
5  
6  
7  
8  
9  
10  
11  
12  
13  
14  
15  
16  
17  
18  
19  
20  
21  
22  
23  
24  
25  
26  
27  
28  
29  
30  
31  
32  
33  
34  
35  
36  
37  
38  
39  
40

## Supplementary Appendix

This appendix has been prepared by the authors to provide readers additional details and information about the TACT study.

Supplement to Lamas GA, Goertz C, Boineau R, Mark DB, Rozema T, Nahin RL, Lindblad L, Lewis ER, Drisko J, Lee KL. Effect of disodium EDTA chelation regimen on cardiovascular events in patients with previous myocardial infarction: The TACT Randomized Trial.

Version 02-13-2013

41  
42  
43  
44  
45  
46  
47  
48  
49  
50  
51  
52  
53  
54  
55  
56  
57  
58  
59  
60  
61  
62  
63  
64  
65  
66  
67  
68  
69  
70  
71  
72  
73  
74  
75  
76  
77  
78  
79  
80  
81  
82  
83

## Supplementary Appendix

### Table of Contents

|                                                                     |    |
|---------------------------------------------------------------------|----|
| TACT investigators, leadership, and trial committees                | 3  |
| Sample size calculations for TACT and changes in sample size        | 7  |
| Interim monitoring in TACT and the final criterion for significance | 9  |
| Consent withdrawals and loss to follow-up                           | 11 |
| Sensitivity analyses with imputation of outcomes                    | 18 |
| Distribution of infusion discontinuations by treatment arm          | 21 |
| Treatment discontinuations and side effects                         | 24 |
| Supplementary tabulations for the subgroup analyses                 | 26 |
| Adverse events reported during the trial                            | 29 |

84 **In addition to the authors the following Investigators and Coordinators**  
85 **participated in the Trial to Assess Chelation Therapy.**

86

87 **United States**

88 Biogenesis Medical Center- Theodore Rozema, Dolly Corbin; Tru Med- Rajiv Chandra, Terry  
89 Murphy; Comprehensive Heart Care- James Roberts, Debra Braun; Brian Dieterle MD, PhD,  
90 Internal Medicine-Brian Dieterle, Debra Louderback; Arkansas Center for Physical Medicine  
91 and Rehabilitation, Northeast LA Anti-Aging and Wellness Center, Louisiana Anti-Aging &  
92 Wellness Care- Linda Bunch, April Archey, Shauna Gallien, Kim Robinson; Celebration of  
93 Health Association- Terry Chappell, Marcia Arnold; The Castle Clinic, PLLC- Robert C. Allen,  
94 Laura Whitaker; Patrick A Golden-Patrick Golden, Kathy Sasser; Born Preventive Health Care  
95 Clinic & Crossroads Healing Arts- Tammy Born, Judy Schneider; Full Circle Medical Center-  
96 Charles Adams, Crystal Montgomery; Wellness and Longevity Center of Louisiana- Sangeeta  
97 Shah, Debbie Vige; Heart and Vascular Center for Research, Inc.- Clayton Bredlau, Amy  
98 Heineman; Integrative Medical Associates- Connie Ross, Michelle Simpson; University of  
99 Missouri Health Care System- Greg Flaker, Sharon Clasby; Waters Preventive Medical Center-  
100 Robert Waters, Sarah B. Chapman; Heart Care Center- Russell Silverman, Sherri Loucks;  
101 Wellness Works- Carol Roberts, Berni McClendon; Mayo Clinic and Foundation Cardiovascular  
102 Health Clinic- Gerald Gau, Dawn Shelstad; Aurora Denver Cardiology Associates- Nampalli  
103 Vijay, Melinda Washam; Scripps Center for Integrative Medicine- Erminia Guarneri, Eva Stuart;  
104 Family Health Medical Services- Robert Berke, Paige Davidson; The Cardiovascular Center for  
105 Research- Anita Arnold, Dana Kappel; Complementary Medical Services- James Carter,  
106 Kaylynn LeBlanc; Magaziner Center for Wellness- Allan Magaziner, Betty Ann Persico; The  
107 Preventive Medicine Center- Kenneth Ganapini, Venus Barney; Upper Valley Family Care-  
108 Richard Plumb, Lynn Shough; Family/ Complimentary Medicine- Karen Dantin, Laurie McDuff;  
109 Baystate Medical Center-Mara Slawsky, Judith Fleurent; Florida Cardiovascular Institute- John  
110 Sullebarger, Leona Stewart; Freedom Center for Advanced Medicine- William David Voss,  
111 Lorna Gordon; Tequesta Family Practice- R.J. Oenbrink, Joe Militello; Virginia Beach General  
112 Hospital- John Griffin, Pam Hollsten; Johns Hopkins University- Pamela Ouyang, Jeanne  
113 Wingo; Bircher Chiropractic and Wellness Center- Donald Riemer, Laura Sembach; Jack E.  
114 Young, MD, Estela Fransbergen; Chris Hatlestad, MD, PC, Center for Environmental Medicine-  
115 Chris Hatlestad, Christine Ohlemann, Cambor Wade; The Blend Institute- Timothy Blend,  
116 Helena Williams; University of Arkansas for Medical Sciences, Central Arkansas Veterans  
117 Healthcare System- Joseph Bissett, Sandra McLaren, Sharon Locke;Care Foundation Inc-  
118 Timothy Logeman, Karen Olson; COR Research- Clinton Corder, Clinton, Michael Stout;  
119 Androscoggin Cardiology Associates- Robert Weiss, Sarah Dumais; Chelation Centers of Texas-  
120 Dorothy Merritt, Elizabeth Collins; Deborah Heart and Lung Center- Alexander Poulathas,  
121 Linda Dewey; Innovative Research of West Florida- Miguel Trevino, Kimberly Mai; The  
122 Cardiovascular Group- Lawrence Miller, Deanna Overbeck; Advantage Health Center, LLC-  
123 Donald Tice; Hope Medical Holistic Clinic- Zbigniew Grudzien, Maryna Kuzmin; Hudson

124 Valley Heart Center- Glenn Gerber, Patricia O'Brien; Integrative Medicine Center at Schneck  
125 Medical Center- Steven Windley, Stephanie Pyle; Land Clinical Studies-James Garofalo,  
126 Krystle Chavez; Mount Sinai Medical Center of Florida- Todd Heimowitz, Helen Garcia;  
127 Advanced Family Medicine- James Johnson, Rosemary Stevenson; Life Family Practice Center  
128 for Complementary and Alternative Medicine- Nelzon Kraucak, Mariann Haring; Parchment  
129 Family Practice- Eric Born, Julie Ladkrood; Schachter Center for Complementary Medicine-  
130 Michael Schachter, Sally Minniefield; The Ohio State University Medical Center- Raymond  
131 Magorien, Luba Mazanec; Wholistic Health Center- Ralph Miranda, Barb Casella; Athens  
132 Surgery Clinic- Joseph Holliday, Vivian Holliday; Henry Ford Health System- Jonathan  
133 Ehrman, Matthew Saval; Preventive Medicine- Varsha Rathod, Heather Moran; The Heart  
134 Group- Joseph O'Bryan, Mary Barr; Cardiac Solutions- Vishal Patel, Denise Wells; New York  
135 University, School of Medicine-Harmony Reynolds, Chao Wang; Riverside Family Medical-  
136 Lisa Merritt, Lisa Lockett; White-Wilson Medical Center, P.A.- Leslie Fleischer, Cheri Penas;  
137 Caring Cardiology- Roy Heilbron, Celia Heilbron; Hillsboro Family Medicine- Paul Kotturan,  
138 Nalini Reddy; Phoenix Wellness Group- Eleanor Hynote, Katie Lacey; Tyler Total Wellness  
139 Center- Pieter deWet, Cindy deWet; University Hospitals of Cleveland- Austin Halle, Lian  
140 Yang; Dr. Yulius Poplyansky- Yulius Poplyansky, Marjorie Patino; Main Line Health Heart  
141 Center- Robert Bulgarelli, Susan Herring; Marino Center for Integrative Medicine- Guy Pugh,  
142 Vivian Cole; Northwest Indiana Cardiovascular Physicians Inc.- Hector Marchand, Cheryl  
143 Kwiatkowski; Alaska Cardiovascular Research Foundation- Paul Peterson, Lori Heaney; John F.  
144 Kennedy Medical Center- Steven Borzak, Jamie Kosik; Grace Medical Association- Smart  
145 Idemudia, Krista Fallin; Mark O'Neal Speight, MD- Mark O'Neal Speight, Janine Speight; New  
146 York VA, Cardiovascular Clinical Research Center-Steven Sedlis, Estelita Anteola; Baptist  
147 Cardiac and Vascular Institute- Barry Katzen, Ivette Cruz; Bronx-Lebanon Hospital Center-  
148 Bhalodkar, Narendra, Noneta Montinola; Cardiology Consultants of South Florida- Ricky  
149 Schneider, Rochelle Mckenzie; Grossman Wellness Center- Terry Grossman, Paula Quezada;  
150 Longevity Medical , PA- Ivan Krohn, Lewis S. Korb; Pearsall Medical and Bariatrics- Gurney  
151 Fields Pearsall, Marina M Pearsall; The Center for the Improvement of Human Functioning  
152 International- Ron Hunninghake, Mavis Schultz; University of Kansas Medical Center- Jeanne  
153 Drisko, Elizabeth Schrick; West Holt Medical Clinic- Robert Randall, Teresa Kohle; Boice  
154 Willis Clinic- Shalendra Varma; Florida Medical Clinic, P.A- Hector Fontanet, Precious Hoyle;  
155 Jenks Health Team- Gerald Wootan, Susan Shaw; Maine Integrative Wellness- Sean McCloy;  
156 Marjon Fariba- Marjon Fariba, Sepideh Arvin Matthew; Mount Sinai Medical Center- Robert  
157 Ciccia-Maclean, Pablo Guala; Stockton Family Practice- Stuart Freedenfeld, Falecia Wasicko;  
158 The Institute of Integrative Medicine- Majid Ali, Mahboobullah Baig; Woodlands Healing  
159 Research- Robert Schmidt, Rose Neuweiler; Berman Center for Outcomes and Clinical  
160 Research- Richard Grimm, Mary Perron; Casdorff Clinic- Richard Casdorff, Heather  
161 Browning; Coyote Healing Center Integrative Medicine and Psychiatry- Richard Dexter,  
162 Christine Rupley; Staten Island Heart- James Lafferty, Lenora Tafuri-Acevedo; Hyperbaric  
163 Medicine Inc.-Albert Zant, Michelle Potpan; Lake Cable Medical Center- Jack Slingluff, John

164 Mountford; The Center for Optimal Health- Ann McCombs, Arlene Sellereite;  
165 ACT/Cardiovascular Research Institute- Ronald Karlsberg, Tracey S. Gerez; Gordon Medical  
166 Associates- Eric Gordon, Win Bertrand; Heart Specialists- Rajinder Bhalla, Teresa Hicks; Matrix  
167 Clinic- Lisa Lichota, Keith Rost; Mueller Institute For Functional Medicine & Research- Jeffrey  
168 Mueller, Jeffrey, B. J. West; Pain and Healing Center- Angelique Hart; Rhinebeck Health  
169 Center- Kenneth Bock, Debra Truin; St. Charles Health System- Bruce McLellan, Noura Sall;  
170 Wellness Center- Jose Oblena, Bonita Harris; Wright Health & Wellness Center- Robert Wright,  
171 Alma Steffen.

172

### 173 **Canada**

174 Seekers Centre for Integrative Medicine- Richard Nahas (Country Leader), Shadi Nahas;  
175 Chelox- Shmuel Bergman, Mary Toro; Chelation & Natural Therapy, Chelation Center of Don  
176 Valley Inc, Chelation Center of Barrie - Fred Hui, Eva Pacaba; Markham Integrative Medicine-  
177 John Gannage, Tony Estacio; Jaconello Health Centre- Paul Jaconello, Hildegard Beath; The  
178 Wellness Centre- Ben Boucher, Robyn Whitty; North Bay Complementary- Jean Aubry, Barbara  
179 Brooks; Anti-Aging & Family Wellness Clinic- Arun Dosaj, Diane Dosaj; Montreal Heart  
180 Institute- Jean-Claude Tardif, Randa Zamrini; Dr. Clare Minielly; Cline Medical Centre- John  
181 Cline, Frank Pluta; Recherche Cardiologie Hôtel-Dieu du CHUM- François Reeves; Saskatoon  
182 Chelation Centre- Edward Nykiforuk, Val Kalyn.

183

184 **Data and Safety Monitoring Board:** Howard Hodis (Chair), Steven Buckley, Barry R. Davis,  
185 Theodore Ganiats, Gail Geller, Robert Nash, George Wyse.

186

### 187 **Committees and Coordinating Centers.**

188 **Clinical Events Committee at the Brigham & Women's Hospital:** Marc A Pfeffer, Scott D.  
189 Solomon, Eldrin F. Lewis, Peter V. Finn, Sateesh Kesari, Satish Kenshai, Amita Singh, Chau  
190 Duong, Renée Mercier, Rebecca Messing.

191

192 **Data Coordinating Center at the Duke Clinical Research Institute, Durham, NC:** Kerry Lee  
193 (Principal Investigator), Sandra Tourt-Uhlig, Joyce Good, Lauren Lindblad, Sharon Stroud,  
194 Loren Lytle, Vivian Thompson, Linda Szczech, Gerard Esposito, Meredith Smith, Trevorlyn  
195 Haddock, Constance Bardinelli, Madeline Earnest, Wanda Parker, Lindsey Lambe, Cresha  
196 Cianciolo, Mary Nahm, Brian Fox, Anthony Wilson, Emlie Johnson, Brenda Vann, Mary  
197 Molina, Rita Weber, Leslie Williams.

198

199 **Economics and Quality of Life Coordinating Center at the Duke Clinical Research**  
200 **Institute, Durham, NC:** Daniel Mark (Principal Investigator), Nancy Clapp-Channing, Diane  
201 Minshall- Liu, Jason Blevins, Kevin Anstrom, David Knight, Thomas Redick, Andrea Davis,  
202 Miguel Pena.

203

204 **Clinical Coordinating Center at Mount Sinai Medical Center, Miami Beach, FL:** Gervasio  
205 Lamas (Principal Investigator), Ana Mon, Esteban Escolar, Steven Hussein, Pablo Guala,  
206 Kayvan Amini, Faisal Shamshad, Jacqueline Arciniega, Jamie Zimmerman, Danielle Hollar,  
207 Beatriz Acevedo, Helen Garcia, Adam Williams, Matthew Shields, Renea Moss, Virginia  
208 Martini, Parminder Singh, Jewmaull Reed, Maria Salas, Carlos Zamora, Tristan Edwards,  
209 Stephanie Escalante, Laura Davila, Rachel Margolis.

210

211

212

213

214

215

216

217

218

## Sample Size Calculations for TACT and Changes in Sample Size

### Original Sample Size Calculations:

As stated in the study protocol, several design factors and research objectives were considered when developing the original sample size estimates for TACT. A first important objective was that there be sufficient patients and a sufficient number of endpoints to provide a high degree of confidence (at least 85% power) for detecting clinically important differences between the randomized arms in the primary endpoint. Second, important secondary endpoints, such as measures of quality-of-life, were also considered. Third, we considered it important for the overall sample to be large enough to permit examination of treatment effects in selected pre-specified subgroups of patients where chelation therapy might be particularly advantageous, or where the question of a treatment benefit from chelation therapy is particularly relevant. Fourth, because the treatment protocol was very intensive (requiring frequent clinic visits for intravenous therapy over an extended period of time), it was likely (despite our best efforts) that some patients would prematurely discontinue therapy (drop-out) and thus not realize the full benefits of the intervention. This likelihood was reflected in the sample size calculations. Finally, the sample size was determined to provide a reasonably robust level of confidence of detecting clinically important therapeutic effects even if our projections of event rates and treatment differences proved to be optimistic.

The assumptions used in the original calculations included the following:

- 20% event rate at 2.5 years in the placebo arm  
(This figure took into account the factorial nature of the study and was based on event rates reported in other studies of similar post-MI patients, as described in the TACT protocol.)
- 25% reduction in the active (chelation) arm (i.e., 15% event rate at 2.5 years)
- Accrual period (length of patient recruitment): 3 years
- Minimum length of follow-up: 1 year  
(Thus, the average duration of follow-up in the trial would be 2-2.5 years.)
- Dropout (non-compliance) rate of 7.2% per year (~22% over three years)  
(Estimated based on a careful review of the previous literature in this area and estimates from the experience of contemporary chelation practitioners)
- Loss to follow-up: 3%
- Equal allocation of patients to the two arms of the trial
- $\alpha = 0.05$
- Power = 0.85

Using the Schoenfeld formulation for calculating sample size for the proportional hazards model (Schoenfeld DA. Sample-size formula for the proportional-hazards regression model. *Biometrics* 1983;39:499-503), appropriately factoring in the non-compliance and loss to follow-up, and

268 making use the nQuery Advisor sample size software, the resulting total sample size was  
269 determined to be **2,372**. This was the target sample size at the beginning of the trial.

270

### 271 **Changes to the Study Sample Size:**

272

273 Enrollment progress in the study was closely monitored by the study leadership as well as in  
274 regular reviews of the trial by the NIH-appointed Data and Safety Monitoring Board (DSMB).  
275 Patient enrollment proved to be much more challenging than expected, due in part to the heavy  
276 demands and time required of patients to undergo the intensive treatment regimen of 40  
277 infusions, each infusion requiring at least 3 hours. It soon became apparent that more than the 3  
278 years originally planned for recruitment would be required to accrue the number of patients  
279 originally targeted for the trial. New enrollment projections and timelines were developed, with  
280 corresponding statistical power calculations (unconditional power) for those projections.

281

282 The first major adjustment to sample size was incorporated in the study protocol dated May 5,  
283 2006 (Protocol Version 4). The sample size was adjusted downward to 1,950 patients, the  
284 recruitment period was extended to 4.5 years, and with the other assumptions described above,  
285 the power of 85% would be preserved.

286

287 Enrollment in the study stayed on target with respect to this modification for a time, but  
288 challenges, such as the OHRP inquiry during which all enrollment activity was suspended for  
289 several months, slowed progress with patient recruitment, and the study fell short of the  
290 enrollment rate required to meet the targets outlined in Protocol Version 4.

291

292 In July 2009, continued challenges in the recruitment of patients led the TACT study leadership,  
293 completely blinded to all outcome information, to request from the NIH sponsors and the DSMB,  
294 a reduction of the total enrollment from 1,950 to 1,700, with follow-up extending through 2011.  
295 The investigators projected that this number of patients could realistically be achieved by the 3<sup>rd</sup>  
296 quarter of 2010, allowing at least one full year of follow-up on all patients. With the  
297 substantially prolonged enrollment period (approximately 7 years compared to the 3 years  
298 originally conceived), the average duration of follow-up for the patients would approach 5 years  
299 (instead of the 2-2.5 years originally conceived). This extension in the length of follow-up  
300 allowed the unconditional statistical power for the trial to remain at 85%.

301

### 302 **Final Note:**

303

304 It is noteworthy that at the end of the trial after the data were all compiled, the 2.5-year event rate  
305 in the placebo arm was 21.6%, slightly higher but remarkably close to the 20% that was  
306 projected in planning the trial. Hence the statistical power was not attenuated because of a lower  
307 than expected event rate.

308

309

310

311

312



313 **Interim Monitoring in TACT and the Final Criterion for Significance**

314 Concerns have been raised about the interpretation of the overall findings in the trial, particularly  
315 in view of the relatively large number of interim analyses and the fact that the final p-value fell  
316 so close to the required level of significance, and the upper level of the confidence interval for  
317 the hazard ratio (0.99) is so close to 1.0.

318 To ensure the safety of patients enrolled in trials like TACT, it is standard practice in NHLBI-  
319 sponsored trials for the DSMB to meet approximately every six months. This frequency of  
320 meetings is the pattern that was followed in TACT. With the unknown short and long-term  
321 consequences of this therapy, the scrutiny this trial was receiving from outside critics, and the  
322 significant investment of public funds that was required to conduct the trial, the DSMB desired a  
323 comprehensive report of the accumulating data at these regular meetings. This frequency,  
324 combined with the prolonged duration of the trial, explains the number of interim reviews of the  
325 data (11). Although many of those reviews were mainly for safety and review of adverse events  
326 with no intent of stopping the trial for efficacy, we have nonetheless reported and counted every  
327 review in which the DSMB had access to treatment-specific outcome data. The pre-specified  
328 statistical plan for the study made provision for interim reviews of the primary outcome data by  
329 using the well-established flexible approach involving an alpha-spending function with O'Brien-  
330 Fleming type monitoring boundaries as outlined in the study protocol. This particular approach  
331 to interim monitoring has been used frequently in clinical trials because the number of analyses  
332 and the timing of those analyses do not need to be pre-specified. What is pre-specified is the rate  
333 at which the overall alpha is "spent." The O'Brien-Fleming type boundaries are very broad in  
334 the early part of the trial so that a rather dramatic result is required to cross an efficacy boundary,  
335 and thus very little of the overall alpha is "spent" in the early reviews of the data. With such  
336 boundaries, it is highly unlikely that a type I error would be committed early in the trial. As  
337 more information accumulates, the height of the boundaries gradually decreases so that at the  
338 end of the trial, the final analysis can be performed with a relatively modest adjustment to the  
339 overall level of significance chosen for the trial.

340 The statistical formulation of the O'Brien-Fleming-like cumulative alpha spending function is

341 
$$\alpha(t) = 2[1 - \Phi(z_{\alpha/2} / t^{1/2})]$$

342 where  $\Phi$  is the standard normal cumulative distribution function,  $z_{\alpha/2}$  is the  $\alpha/2$  percentage point  
343 of the standard normal distribution, and  $t$  represents the information time when the analysis is  
344 performed. At the end of the trial ( $t=1$ ), if the overall level of significance chosen for the trial is  
345 0.05, the value of this expression is simply 0.05, so that all of the alpha is spent.

346 The table below shows the O'Brien-Fleming type monitoring boundaries for each of the 11  
347 interim reviews of the data, the cumulative alpha spent up to and including the final analysis, and

348 on the bottom row of the table, the level of significance (0.036) required at the final analysis. As  
349 can be seen in the right-hand column, very little alpha was spent for the first 5 or 6 analyses.

350 Regarding the final alpha level, the results have been checked and the calculations verified by an  
351 independent senior-level experienced statistician.

352

353 **Table A-1. Interim analyses and monitoring boundaries**

| <b>Interim</b> | <b>Lower Monitoring Boundary</b> | <b>Upper Monitoring Boundary</b> | <b>p-value required for significance</b> | <b>Cumulative alpha</b> |
|----------------|----------------------------------|----------------------------------|------------------------------------------|-------------------------|
| 1              | -8.0000                          | 8.0000                           | <0.00001                                 | 0.00000                 |
| 2              | -8.0000                          | 8.0000                           | <0.00001                                 | 0.00000                 |
| 3              | -4.3320                          | 4.3320                           | 0.00001                                  | 0.00001                 |
| 4              | -3.7166                          | 3.7166                           | 0.00002                                  | 0.00021                 |
| 5              | -3.3008                          | 3.3008                           | 0.00096                                  | 0.00103                 |
| 6              | -2.9981                          | 2.9981                           | 0.00272                                  | 0.00305                 |
| 7              | -2.7656                          | 2.7656                           | 0.00568                                  | 0.00668                 |
| 8              | -2.5798                          | 2.5798                           | 0.00989                                  | 0.01210                 |
| 9              | -2.4271                          | 2.4271                           | 0.01522                                  | 0.01930                 |
| 10             | -2.2986                          | 2.2986                           | 0.02153                                  | 0.02815                 |
| 11             | -2.1886                          | 2.1886                           | 0.02863                                  | 0.03846                 |
| Final          | -2.0930                          | 2.0930                           | 0.03635                                  | 0.05000                 |

354

355

356

357

358

## Consent Withdrawals and Loss to Follow-up

359

360 As reported in the primary manuscript, there were a total of 289 patients (17%) who, during the  
361 course of the trial, withdrew consent for continued follow-up in the study. Of the 289  
362 withdrawals, 115 (40%) were in the EDTA chelation arm, and 174 (60%) were in the placebo  
363 arm. A plot of Kaplan-Meier curves depicting the pattern of consent withdrawals in the two  
364 randomized arms is presented in Figure A-1, including a statistical assessment of the difference  
365 between arms. There were a significantly greater number of placebo patients who withdrew  
366 consent compared to the active arm in the trial. The median (IQR) duration of follow-up of the  
367 withdrawn patients was 10 (3, 25) months overall, 10 (3, 28) months in the EDTA arm and 10 (3,  
368 23) months in the placebo arm.

369 In addition to the patients who withdrew consent, at the end of the trial there were 22 patients  
370 who, despite concerted efforts, could not be located, and therefore were lost to follow-up (13 in  
371 the chelation arm and 9 in the placebo arm). The median (IQR) duration of follow-up of those  
372 patients before they became lost was 37 (23, 47) months overall, 37 (33, 47) months in the  
373 EDTA chelation arm and 31 (23, 42) months in the placebo arm. With an average of  
374 approximately 3 years of follow-up in these patients, the loss of information was less than the  
375 loss among patients who withdrew consent.

376 The patients who withdrew consent or were lost to follow-up were included in the analysis with  
377 as much follow-up (person-time) as was available until they withdrew consent or were lost to  
378 follow-up, at which time the patient became a censored observation. However, not all of these  
379 patients were censored observations because a number of them (52 of the 289 patients who  
380 withdrew consent and 3 of the 22 patients lost to follow-up) experienced one of the primary  
381 events, and those events were all included in the primary treatment comparison. Of the 52  
382 withdrawal patients with an event, 43 withdrew consent later in their follow-up after having  
383 experienced one of the primary endpoints. Nine of the 52 withdrew consent prior to  
384 experiencing the primary endpoint, but in our search of death registries at the end of the trial,  
385 were discovered to have died. The primary analysis was based on all of the outcomes that were  
386 known, without any imputation of outcomes in the patients who withdrew consent or were lost to  
387 follow-up. However, some sensitivity analyses have been performed to assess the robustness of  
388 the results under different assumptions about event rates among the patients who withdrew  
389 consent. Those analyses are described in the next section of this supplement.

390 In Table A-2, baseline characteristics of the 289 patients who withdrew consent are compared  
391 with corresponding characteristics of the patients enrolled in TACT who did not withdraw  
392 consent. There are statistically higher percentages of females, anterior MIs, diabetics, and  
393 patients with a history of stroke among the patients who withdrew consent, which could translate  
394 into a slightly higher risk profile for the consent withdrawal patients. By the same token, diabetes  
395 and prior anterior myocardial infarction were markers, in the subgroup analyses, for significant  
396 benefit from chelation therapy.

397 Of key importance, however, is the fact that the baseline characteristics of the patients who  
398 withdrew consent are very comparable in the two arms of the trial (Table A-3). That is, the risk  
399 profiles of the EDTA patients and the placebo patients who withdrew consent appear to be  
400 remarkably similar. Because there were significantly more patients in the placebo arm who  
401 withdrew consent compared to the active chelation arm, among the patients where we may  
402 possibly be missing primary outcome events because of consent withdrawals, there are likely  
403 more such events in the placebo arm than in the active treatment arm (because there were more  
404 withdrawals in the placebo arm), which would only accentuate the benefit of chelation therapy.

405 These observations are relevant in considering imputations of possible outcomes of the patients  
406 who withdrew consent or were lost to follow-up as provided in the sensitivity analyses reported  
407 in the next section.

408

Figure A-1

TACT  
Kaplan-Meier Estimates of Withdrawn Consent  
Chelation Therapy vs. Placebo

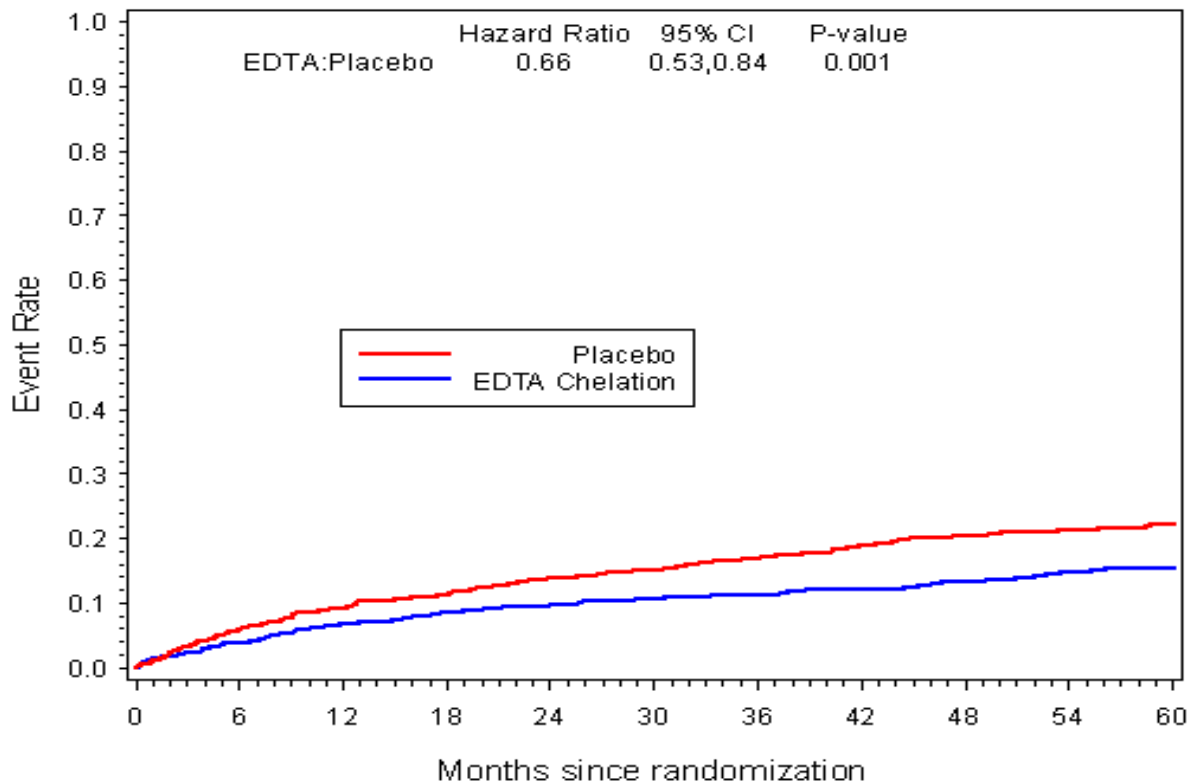

| Number at Risk | 0   | 6   | 12  | 18  | 24  | 30  | 36  | 42  | 48  | 54  | 60  |
|----------------|-----|-----|-----|-----|-----|-----|-----|-----|-----|-----|-----|
| EDTA Chelation | 839 | 801 | 759 | 712 | 664 | 615 | 600 | 569 | 520 | 443 | 293 |
| Placebo        | 869 | 811 | 771 | 722 | 666 | 623 | 594 | 546 | 494 | 427 | 271 |

410

411 Note: The p-value is based on the log-rank test.

**Table A-2. Baseline Characteristics of the Participants Who Did vs. Did Not Withdraw Consent**

|                                                  | <b>Withdrawn<br/>Consent<br/>(N= 289)</b> | <b>No Withdrawn<br/>Consent<br/>(N=1419)</b> | <b>P</b> |
|--------------------------------------------------|-------------------------------------------|----------------------------------------------|----------|
| <b><u>Demographics</u></b>                       |                                           |                                              |          |
| Age (years)                                      | 64 (58, 71)                               | 65 (59, 72)                                  | 0.100    |
| Female                                           | 63 ( 22%)                                 | 236 ( 17%)                                   | 0.035    |
| Minority (Hispanic or non-Caucasian)             | 30 ( 10%)                                 | 126 ( 9%)                                    | 0.419    |
| BMI                                              | 31 (27, 36)                               | 30 (27, 33)                                  | 0.004    |
| <b><u>History</u></b>                            |                                           |                                              |          |
| Time from qualifying MI to randomization (years) | 4.7 (1.6, 9.1)                            | 4.6 (1.7, 9.3)                               | 0.751    |
| Anterior MI                                      | 135 ( 47%)                                | 539 ( 38%)                                   | 0.006    |
| Congestive heart failure                         | 59 ( 20%)                                 | 248 ( 17%)                                   | 0.236    |
| Valvular heart disease                           | 24 ( 9%)                                  | 151 ( 11%)                                   | 0.298    |
| Stroke                                           | 27 ( 9%)                                  | 84 ( 6%)                                     | 0.031    |
| Diabetes                                         | 110 ( 38%)                                | 428 ( 30%)                                   | 0.008    |
| Peripheral vascular disease                      | 50 ( 17%)                                 | 218 ( 15%)                                   | 0.390    |
| Hypertension                                     | 199 ( 69%)                                | 970 ( 68%)                                   | 0.868    |
| Hypercholesterolemia                             | 214 ( 77%)                                | 1156 ( 83%)                                  | 0.026    |
| Atrial fibrillation                              | 33 ( 12%)                                 | 162 ( 12%)                                   | 0.746    |
| Former Cigarette Smoker                          | 166 (57%)                                 | 789 (56%)                                    | 0.566    |
| <b><u>Coronary revascularization</u></b>         |                                           |                                              |          |
| CABG                                             | 134 ( 46%)                                | 640 ( 45%)                                   | 0.694    |
| PCI                                              | 179 ( 62%)                                | 828 ( 58%)                                   | 0.259    |
| Either CABG or PCI                               | 242 ( 84%)                                | 1172 ( 83%)                                  | 0.639    |
| <b><u>Presenting Characteristics</u></b>         |                                           |                                              |          |
| Blood Pressure (mm Hg)                           |                                           |                                              |          |
| Systolic                                         | 130 (118, 140)                            | 130 (120, 140)                               | 0.221    |
| Diastolic                                        | 78 (70, 82)                               | 76 (70, 80)                                  | 0.292    |
| NYHA Functional Class                            |                                           |                                              | 0.671    |
| No heart failure                                 | 221 ( 76%)                                | 1128 ( 79%)                                  |          |
| Class I                                          | 39 ( 13%)                                 | 171 ( 12%)                                   |          |
| Class II                                         | 23 ( 8%)                                  | 99 ( 7%)                                     |          |
| Class III                                        | 6 ( 2%)                                   | 21 ( 1%)                                     |          |
| Class IV                                         | 0                                         | 0                                            |          |

415 **Table A-2 (continued)**

|                                       | <b>Withdrawn<br/>Consent<br/>(N= 289)</b> | <b>No<br/>Withdrawn<br/>Consent<br/>(N=1419)</b> | <b>P</b> |
|---------------------------------------|-------------------------------------------|--------------------------------------------------|----------|
| <b><u>Concomitant Medications</u></b> |                                           |                                                  |          |
| Aspirin                               | 235 ( 81%)                                | 1192 ( 84%)                                      | 0.261    |
| Beta-blocker                          | 204 ( 71%)                                | 1022 ( 72%)                                      | 0.621    |
| Statin                                | 204 ( 71%)                                | 1044 ( 74%)                                      | 0.297    |
| ACEI or ARB                           | 182 ( 63%)                                | 902 ( 64%)                                       | 0.849    |
| Clopidogrel                           | 66 ( 25%)                                 | 359 ( 26%)                                       | 0.612    |
| Warfarin                              | 32 ( 12%)                                 | 116 ( 8%)                                        | 0.064    |
| Aspirin or warfarin                   | 251 ( 87%)                                | 1251 ( 88%)                                      | 0.625    |
| Aspirin, warfarin or clopidogrel      | 258 ( 90%)                                | 1294 ( 91%)                                      | 0.499    |
| Diabetes medication                   |                                           |                                                  |          |
| Insulin                               | 43 ( 16%)                                 | 117 ( 9%)                                        | <0.001   |
| Oral hypoglycemic                     | 71 ( 26%)                                 | 309 ( 23%)                                       | 0.205    |
| Multivitamin                          | 116 ( 43%)                                | 599 ( 44%)                                       | 0.795    |
| Other vitamins/minerals               | 112 ( 41%)                                | 740 ( 53%)                                       | <0.001   |
| Herbal products                       | 80 ( 30%)                                 | 480 ( 35%)                                       | 0.105    |
| <b><u>Laboratory Examinations</u></b> |                                           |                                                  |          |
| Glucose (mg/dL)                       | 106 (95, 131)                             | 102 (92, 119)                                    | <0.001   |
| Creatinine (mg/dL)                    | 1.1 (0.9, 1.2)                            | 1.1 (0.9, 1.2)                                   | 0.810    |
| Total cholesterol (mg/dL)             | 165 (144, 206)                            | 164 (141, 193)                                   | 0.098    |
| HDL (mg/dL)                           | 41 (35, 49)                               | 43 (37, 51)                                      | 0.045    |
| LDL (mg/dL)                           | 91 (66, 123)                              | 88 (67, 113)                                     | 0.310    |
| Triglycerides (mg/dL)                 | 160 (109, 216)                            | 137 (95, 200)                                    | 0.005    |

\* Median, 25<sup>th</sup> and 75<sup>th</sup> percentiles are reported for all continuous variables.

Abbreviations used: ACEI= Angiotensin converting enzyme inhibitor; ARB = angiotensin receptor  
416 blocker; HDL = High-density lipoprotein; LDL = low-density lipoprotein

**Table A-3. Baseline Characteristics of Participants Who Withdrew Consent by Treatment Group**

|                                                  | <b>EDTA<br/>Chelation<br/>(N= 115)</b> | <b>Placebo<br/>(N= 174)</b> | <b>P</b> |
|--------------------------------------------------|----------------------------------------|-----------------------------|----------|
| <b><u>Demographics</u></b>                       |                                        |                             |          |
| Age (years)                                      | 65 (59, 71)                            | 64 (57, 72)                 | 0.285    |
| Female                                           | 23 ( 20%)                              | 40 ( 23%)                   | 0.547    |
| Minority (Hispanic or non-Caucasian)             | 11 ( 10%)                              | 19 ( 11%)                   | 0.712    |
| BMI                                              | 31 (27, 36)                            | 31 (26, 36)                 | 0.478    |
| <b><u>History</u></b>                            |                                        |                             |          |
| Time from qualifying MI to randomization (years) | 4.3 (1.7, 8.6)                         | 4.9 (1.5, 9.6)              | 0.900    |
| Anterior MI                                      | 50 ( 43%)                              | 85 ( 49%)                   | 0.370    |
| Congestive heart failure                         | 31 ( 27%)                              | 28 ( 16%)                   | 0.025    |
| Valvular heart disease                           | 8 ( 7%)                                | 16 ( 10%)                   | 0.495    |
| Stroke                                           | 12 ( 10%)                              | 15 ( 9%)                    | 0.604    |
| Diabetes                                         | 46 ( 40%)                              | 64 ( 37%)                   | 0.581    |
| Peripheral vascular disease                      | 23 ( 20%)                              | 27 ( 16%)                   | 0.301    |
| Hypertension                                     | 87 ( 76%)                              | 112 ( 64%)                  | 0.043    |
| Hypercholesterolemia                             | 85 ( 77%)                              | 129 ( 77%)                  | 0.925    |
| Atrial fibrillation                              | 12 ( 11%)                              | 21 ( 13%)                   | 0.676    |
| Former cigarette smoker                          | 66 ( 57%)                              | 100 ( 57%)                  | 0.989    |
| <b><u>Coronary revascularization</u></b>         |                                        |                             |          |
| CABG                                             | 53 ( 46%)                              | 81 ( 47%)                   | 0.938    |
| PCI                                              | 74 ( 64%)                              | 105 ( 60%)                  | 0.493    |
| Either CABG or PCI                               | 98 ( 85%)                              | 144 ( 83%)                  | 0.579    |
| <b><u>Presenting Characteristics</u></b>         |                                        |                             |          |
| Blood Pressure (mm Hg)                           |                                        |                             |          |
| Systolic                                         | 130 (118, 142)                         | 128 (118, 136)              | 0.101    |
| Diastolic                                        | 79 (70, 82)                            | 76 (66, 81)                 | 0.092    |



**Table A-3 (continued)**

|                                       | <b>EDTA<br/>Chelation<br/>(N= 115)</b> | <b>Placebo<br/>(N= 174)</b> | <b>P</b> |
|---------------------------------------|----------------------------------------|-----------------------------|----------|
| NYHA Functional Class                 |                                        |                             | 0.200    |
| No heart failure                      | 81 ( 70%)                              | 140 ( 80%)                  |          |
| Class I                               | 18 ( 16%)                              | 21 ( 12%)                   |          |
| Class II                              | 13 ( 11%)                              | 10 ( 6%)                    |          |
| Class III                             | 3 ( 3%)                                | 3 ( 2%)                     |          |
| Class IV                              | 0                                      | 0                           |          |
| <b><u>Concomitant Medications</u></b> |                                        |                             |          |
| Aspirin                               | 95 ( 83%)                              | 140 ( 80%)                  | 0.646    |
| Beta-blocker                          | 88 ( 77%)                              | 116 ( 67%)                  | 0.072    |
| Statin                                | 79 ( 69%)                              | 125 ( 72%)                  | 0.566    |
| ACEI or ARB                           | 71 ( 62%)                              | 111 ( 64%)                  | 0.723    |
| Clopidogrel                           | 22 ( 20%)                              | 44 ( 28%)                   | 0.184    |
| Warfarin                              | 16 ( 15%)                              | 16 ( 10%)                   | 0.201    |
| Aspirin, warfarin or clopidogrel      | 102 ( 90%)                             | 156 ( 90%)                  | 0.980    |
| Diabetes medication                   |                                        |                             |          |
| Insulin                               | 19 ( 18%)                              | 24 ( 15%)                   | 0.450    |
| Oral hypoglycemic                     | 26 ( 24%)                              | 45 ( 27%)                   | 0.585    |
| Multivitamin                          | 42 ( 39%)                              | 74 ( 45%)                   | 0.362    |
| Other vitamins/minerals               | 40 ( 38%)                              | 72 ( 44%)                   | 0.368    |
| Herbal products                       | 34 ( 32%)                              | 46 ( 28%)                   | 0.553    |
| <b><u>Laboratory Examinations</u></b> |                                        |                             |          |
| Glucose (mg/dL)                       | 109 (96, 138)                          | 104 (94, 129)               | 0.247    |
| Creatinine (mg/dL)                    | 1.1 (0.9, 1.2)                         | 1.0 (0.9, 1.2)              | 0.513    |
| Total cholesterol (mg/dL)             | 165 (145, 212)                         | 165 (144, 204)              | 0.984    |
| HDL (mg/dL)                           | 41 (35, 48)                            | 41 (35, 50)                 | 0.727    |
| LDL (mg/dL)                           | 93 (68, 126)                           | 89 (65, 121)                | 0.418    |
| Triglycerides (mg/dL)                 | 157 (109, 213)                         | 162 (108, 222)              | 0.964    |

For continuous variables, the median, 25<sup>th</sup> and 75<sup>th</sup> percentiles are reported.

Abbreviations used: ACEI = Angiotensin converting enzyme inhibitor; ARB = angiotensin receptor blocker; HDL = High-density lipoprotein; LDL = low-density lipoprotein

## 425 **Sensitivity Analyses with Imputation of Outcomes in Patients Who Withdrew** 426 **Consent or Were Lost to Follow-up**

427 As a sensitivity analysis, we have assessed how the primary treatment comparison would be  
428 affected under a variety of assumptions regarding the occurrence of primary endpoint events  
429 among the patients who withdrew consent or were lost to follow-up. In these analyses, we have  
430 imputed events only among the consent withdrawal or lost patients who did not have a  
431 documented occurrence of one of the primary events prior to the withdrawn consent. This  
432 number includes  $289-52 = 237$  consent withdrawal patients and  $22-3 = 19$  patients who were lost  
433 to follow-up. We performed treatment comparisons where a certain percentage of the withdrawn  
434 or lost patients in each arm were assumed to have a primary event. To simplify the calculations,  
435 the event was assumed to occur at the censoring time. The different percentages of the  
436 withdrawn or lost patients who, in the sensitivity analyses were assumed to have an event are  
437 shown in Table A-4, along with the results of the treatment comparison under each assumption.  
438 Since only a certain percentage of the patients were assumed to have an event, 500 replications  
439 were performed for each scenario using these percentages to randomly select the patients with  
440 events, and the results were then averaged to obtain the estimate of treatment effect.

441 To further explain the analyses for the 16 scenarios listed in Table A-4, the placebo event rate  
442 listed in the table pertains only to the "imputed patients," that is, to the patients randomly  
443 allocated to the placebo arm who were among the 237 consent withdrawal patients and the 19  
444 patients lost to follow-up referenced above. Similarly, the event rate in the EDTA column  
445 pertains only to the "imputed patients" in the active chelation arm. The events that are imputed  
446 among the patients who withdrew consent or were lost to follow-up were then combined with the  
447 event data from all of the other patients (those who did not withdraw consent and were not lost to  
448 follow up) to compute a hazard ratio, confidence interval, and p-value. If we postulate, for  
449 example, that among the withdrawals or lost to follow-up patients, 20% of the placebo patients  
450 and 25% of the EDTA arm patients had events, the patients with events were randomly chosen  
451 among the candidates. As explained in the paragraph above, 500 replications were performed for  
452 each scenario (each time randomly selecting the patients with events) and the results of those  
453 replications averaged to obtain the hazard ratio, confidence interval, and p-value.

454 The percentage of events among the placebo patients who withdrew consent or were lost to  
455 follow-up was varied from 10% to 30% in increments of 10. As reported in Table 2 of the  
456 primary manuscript, the percentage of patients in the placebo arm who, during the course of the  
457 trial, experienced a primary event was 30%. Although a 30% placebo event rate was included  
458 as one of the scenarios in the sensitivity analyses, it is unlikely that the proportion of events  
459 among the withdrawn or lost patients would be that high, as these patients had survived and were  
460 event-free during the portion of the trial in which they were followed. Hence we also considered  
461 several scenarios based on lower percentages of events in the withdrawn or lost patients.

462 For the chelation arm of the trial, we considered percentages of events among the withdrawn or

463 lost patients ranging from -10% (i.e., lower by 10% than the percentage in the placebo arm) to  
464 25% higher than the percentage in the placebo arm. The major objective of these sensitivity  
465 analyses, of course, was to assess the robustness of the overall trial results in the event that  
466 among the patients who withdrew consent or were lost to follow-up, there were more patients in  
467 the active arm with events compared to the placebo arm. However, given that (a) the active arm  
468 patients had fewer events among all the other patients, and (b) as observed in Table A-2, the  
469 patients who withdrew consent had higher percentages with diabetes and an anterior wall MI, we  
470 felt it was reasonable to also consider scenarios where the percentage of events for the active arm  
471 was slightly lower than for the placebo arm.

472 Scenario 1, for example, is based on the assumption that 10% of the withdrawn or lost patients in  
473 the placebo arm experienced an event, and in the active arm, the percentage was 10% less.  
474 Scenarios 2-5 reflect increasingly higher percentages of events in the active arm compared to the  
475 placebo arm (up to 25% higher) while maintaining the level at 10% in the placebo arm.  
476 Scenarios 6-10 have a similar pattern except the percentage of events in the placebo arm is 20%.  
477 In scenarios 11-15, the pattern is again similar except the percentage of events in the placebo arm  
478 is 30%. Scenario 16 is an extreme case in which all patients who withdrew consent or were lost  
479 to follow-up (in both arms) were assumed to experience an event. We have covered a broad  
480 spectrum of possibilities with these scenarios where the withdrawn or lost patients in the active  
481 arm were assumed to have a higher rate of events compared to the placebo patients in order to  
482 see how extreme the difference would have to be before the treatment comparison would no  
483 longer meet the criterion for significance.

484 To explain the other quantities in Table A-4, the “Relative Increase” is simply the relative  
485 change in the percentage of events among the withdrawn or lost patients in the active arm  
486 compared to the percentage of events among the withdrawn or lost patients in the placebo arm.  
487 The hazard ratio and confidence interval in each case is based on the comparison of EDTA vs.  
488 placebo (derived from the Cox model), and the p-value is based on the log-rank test. The  
489 expected number of events is simply the number of events projected in each arm for each  
490 different scenario.

491 Based on the other data observed in the trial and because the baseline risk factors of the patients  
492 who withdrew consent were very similar in the two arms of the trial, the most plausible scenarios  
493 in Table A-4 are those where the percentages of events among the withdrawn or lost patients in  
494 the two arms are nearly equal or slightly favor the active arm. However, the comparison of the  
495 two arms remains significant at the 0.036 level if the relative increase of events in the active arm  
496 is as much as 20% higher than in the placebo arm, and even generally if the percentage of events  
497 in the active arm is 25% higher than in the placebo arm. The hazard ratio for all of these  
498 scenarios remains in the range of 0.80 to 0.84, the p-values are quite robust, and significance of  
499 the treatment effect is maintained, not only for the scenarios for the withdrawn or lost patients  
500 that would be considered most plausible, but also for scenarios that are unfavorable to EDTA  
501 chelation.

502

503 **Table A-4. Sensitivity Analyses Imputation scenarios for consent**  
504 **withdrawals and patients lost to follow-up.**

| Scenario | Percent events Placebo Arm* | Percent events EDTA arm* | Relative Increase | Hazard Ratio** | Lower CI | Upper CI | P-value | EDTA events (expected) | Placebo events (expected) |
|----------|-----------------------------|--------------------------|-------------------|----------------|----------|----------|---------|------------------------|---------------------------|
| 1        | 10                          | 9                        | -10               | 0.82           | 0.69     | 0.97     | 0.0230  | 233                    | 277                       |
| 2        | 10                          | 10                       | 0                 | 0.82           | 0.69     | 0.98     | 0.0258  | 234                    | 277                       |
| 3        | 10                          | 11                       | 10%               | 0.82           | 0.69     | 0.98     | 0.0290  | 235                    | 277                       |
| 4        | 10                          | 12                       | 20%               | 0.83           | 0.70     | 0.98     | 0.0322  | 235                    | 277                       |
| 5        | 10                          | 12.5                     | 25%               | 0.83           | 0.70     | 0.99     | 0.0362  | 237                    | 277                       |
| 6        | 20                          | 18                       | -10%              | 0.81           | 0.68     | 0.96     | 0.0149  | 242                    | 291                       |
| 7        | 20                          | 20                       | 0                 | 0.82           | 0.69     | 0.97     | 0.0189  | 244                    | 291                       |
| 8        | 20                          | 22                       | 10%               | 0.82           | 0.69     | 0.97     | 0.0238  | 246                    | 291                       |
| 9        | 20                          | 24                       | 20%               | 0.83           | 0.70     | 0.99     | 0.0330  | 249                    | 291                       |
| 10       | 20                          | 25                       | 25%               | 0.83           | 0.71     | 0.99     | 0.0368  | 250                    | 291                       |
| 11       | 30                          | 27                       | -10%              | 0.80           | 0.69     | 0.95     | 0.0095  | 252                    | 305                       |
| 12       | 30                          | 30                       | 0                 | 0.81           | 0.69     | 0.96     | 0.0137  | 255                    | 305                       |
| 13       | 30                          | 33                       | 10%               | 0.82           | 0.70     | 0.97     | 0.0216  | 259                    | 305                       |
| 14       | 30                          | 36                       | 20%               | 0.83           | 0.71     | 0.98     | 0.0297  | 261                    | 305                       |
| 15       | 30                          | 37.5                     | 25%               | 0.84           | 0.71     | 0.99     | 0.0370  | 263                    | 305                       |
| 16       | 100                         | 100                      | -                 | 0.79           | 0.68     | 0.91     | 0.0015  | 331                    | 408                       |

505 \* Imputed event rates in patients who withdrew consent or were lost to follow-up and did not  
506 have a primary outcome event prior to censoring

507 \*\* Hazard ratio calculated by combining the imputed outcomes for patients who withdrew  
508 consent or were lost to follow-up with the outcomes of patients who completed the study

509

510

511

512

513

514

## Distribution of Infusion Discontinuations by Treatment Arm

515

516

517 Figure A-2 in this section is a Kaplan-Meier plot of infusion discontinuations by treatment arm,  
518 showing a somewhat higher degree of discontinuations in the placebo arm after approximately  
519 six months into the study.

520 Figure A-3 is a histogram depicting the distribution of the number of infusions received by the  
521 patients in each treatment arm. Consistent with Figure A-2, the histogram shows that patients in  
522 the placebo arm had slightly fewer infusions than did the patients in the chelation arm, although  
523 the treatment arms were comparable with respect to the number of patients who received >35  
524 infusions.

525

526

527

528

529

530

Figure A-2

TACT

Kaplan-Meier Estimates of Discontinuation of Infusions  
Chelation Therapy vs. Placebo

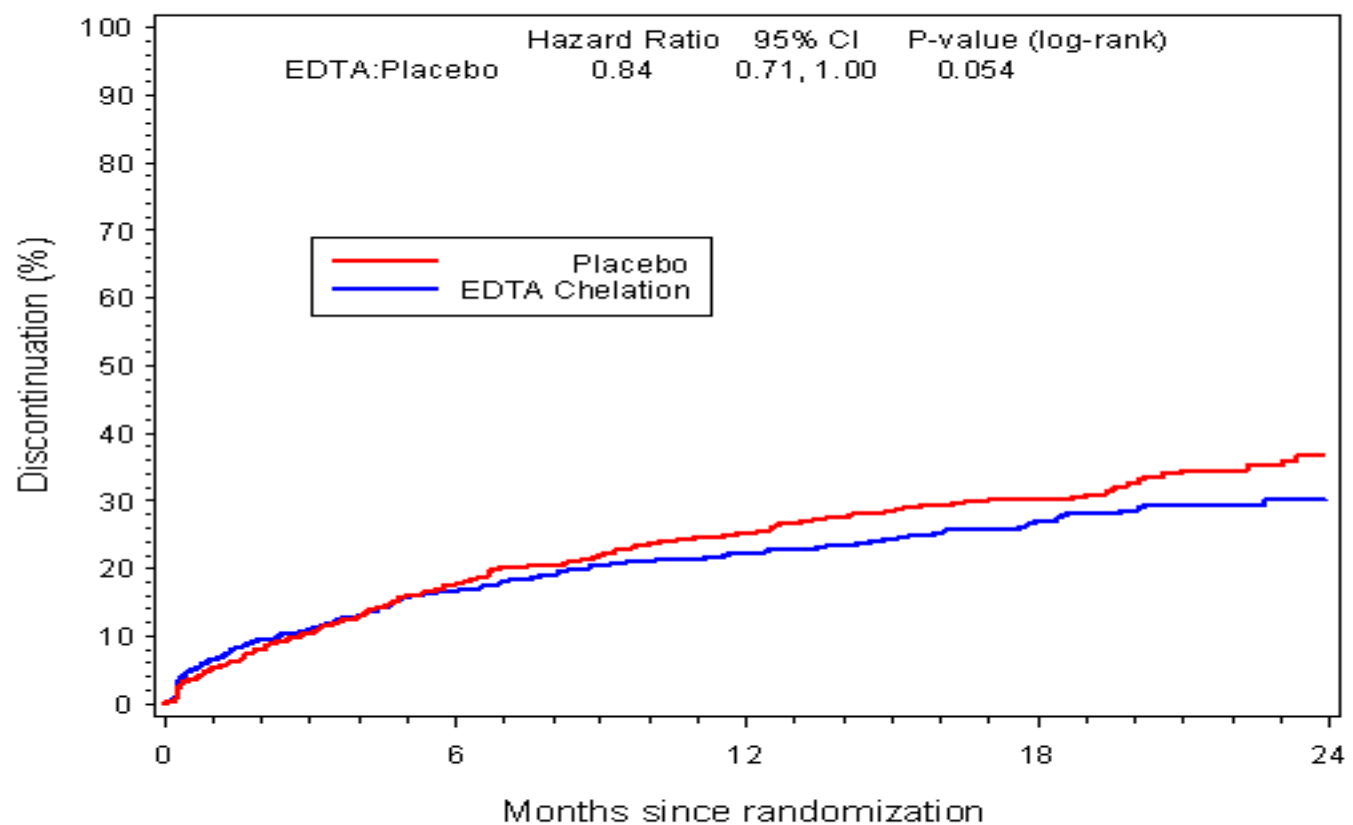

| Number at Risk | 0   | 6   | 12  | 18  | 24 |
|----------------|-----|-----|-----|-----|----|
| EDTA Chelation | 839 | 693 | 628 | 313 | 75 |
| Placebo        | 869 | 710 | 630 | 304 | 64 |

531

532  
533  
534

Figure A-3

# TACT

## Number of Infusions By Treatment

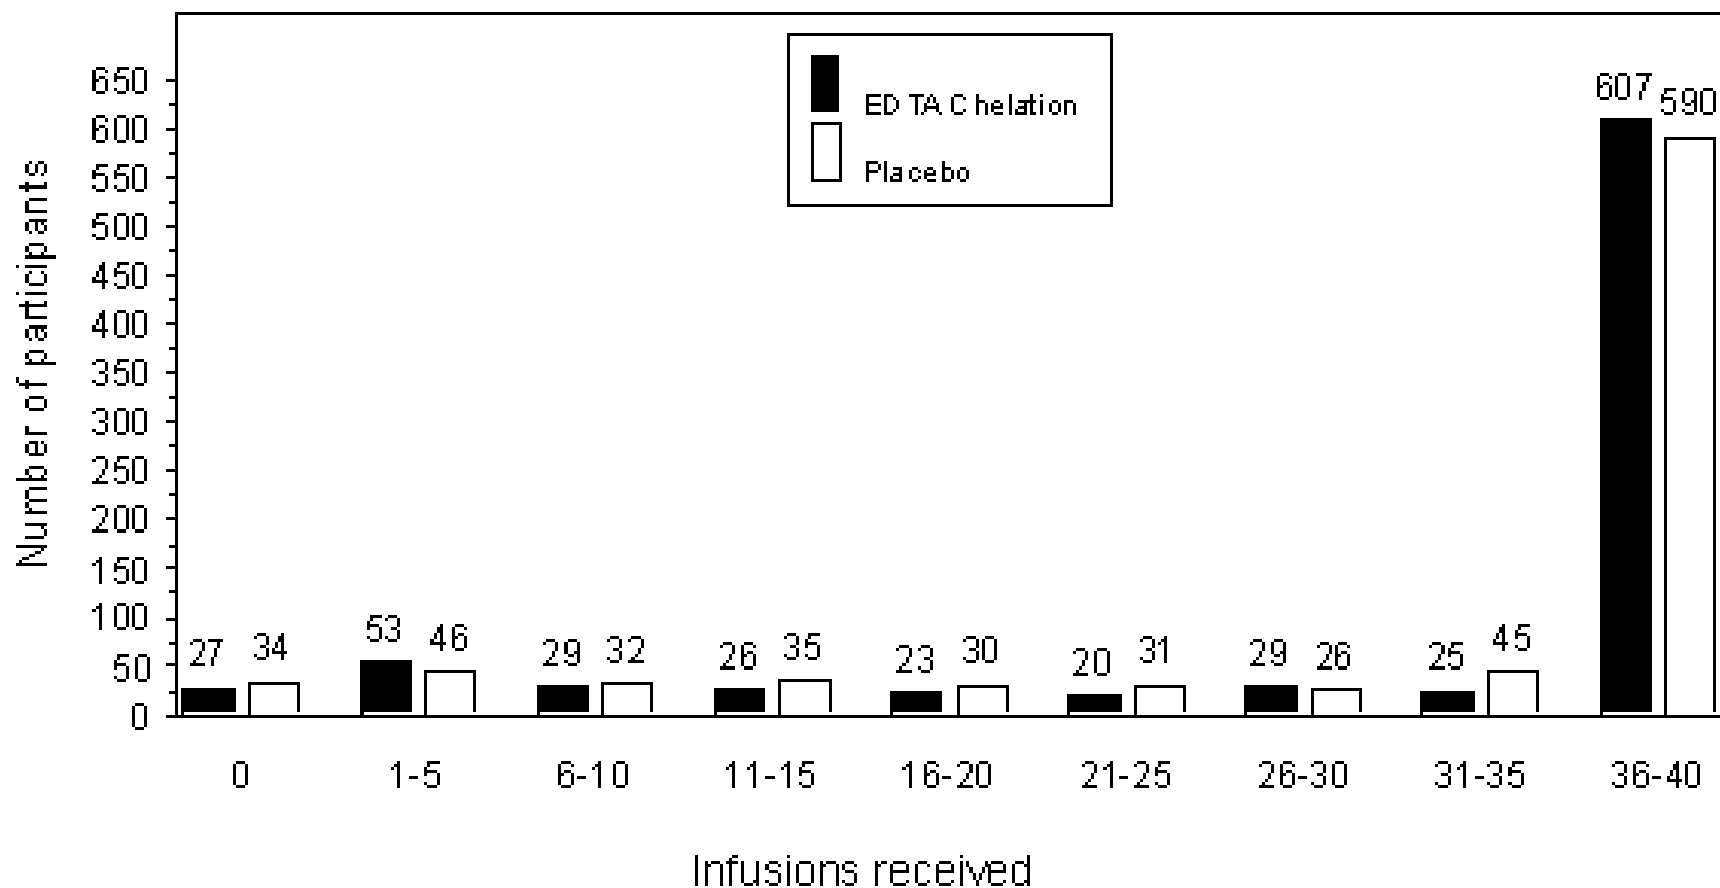

535

536

**Detailed tabulation of treatment discontinuations--Table A-5.**

537 The following table (Table A-5) provides additional detail of infusion discontinuations to  
538 supplement the information in the primary manuscript. The table excludes patients who  
539 discontinued infusions due to death during the trial, and compares the reasons for  
540 discontinuations by treatment group.



541  
542  
543

**Table A-5**  
**Treatment Discontinuations and Side Effects**

| <b>Reasons for Infusion Discontinuation by Infusion Arm *</b> |                                    |                             |                                  |                |
|---------------------------------------------------------------|------------------------------------|-----------------------------|----------------------------------|----------------|
|                                                               | <b>EDTA Chelation<br/>(N= 839)</b> | <b>Placebo<br/>(N= 869)</b> | <b>All Patients<br/>(N=1708)</b> | <b>P-value</b> |
| Premature discontinuation of treatment<br>(excluding death)   |                                    |                             |                                  |                |
| Study infusions                                               | 233 ( 28%)                         | 281 ( 32%)                  | 514 ( 30%)                       | 0.03*          |
| Due to adverse event, procedure or endpoint                   | 38 ( 16%)                          | 41 ( 15%)                   | 79 ( 15%)                        | 0.59**         |
| Patient refusal or noncompliance                              | 129 ( 55%)                         | 160 ( 57%)                  | 289 ( 56%)                       | 0.72**         |
| To receive open-label EDTA                                    | 29 ( 12%)                          | 28 ( 10%)                   | 57 ( 11%)                        | 0.37**         |
| Physician preference                                          | 7 ( 3%)                            | 13 ( 5%)                    | 20 ( 4%)                         | 0.37***        |
| Pain, IV access or side effects                               | 11 ( 5%)                           | 4 ( 1%)                     | 15 ( 3%)                         | 0.03***        |
| Due to closed site                                            | 11 ( 5%)                           | 15 ( 5%)                    | 26 ( 5%)                         | 0.84***        |
| Terminal illness or <u>comorbidities</u>                      | 8 ( 3%)                            | 20 ( 7%)                    | 28 ( 5%)                         | 0.08***        |
| * P-value from Log-Rank Test                                  |                                    |                             |                                  |                |
| ** P-value from Chi-Square Test                               |                                    |                             |                                  |                |
| *** P-value from Fisher's Exact Test                          |                                    |                             |                                  |                |

544

545

546

### **Detailed Tabulations for the Subgroup Analyses**

547

548 The following table (Table A-6) provides additional detail to supplement the information in the  
549 subgroup plot displayed in Figure 2 of the primary manuscript. For each subgroup category, this  
550 table provides the number of patients and the number of events for each treatment arm, as well as  
551 the hazard ratio and 95% confidence interval for comparing EDTA chelation vs. placebo in each  
552 subgroup category.

**Table A-6**  
**SUBGROUP ANALYSES COMPARING EDTA CHELATION TO PLACEBO**  
**FOR PRIMARY ENDPOINT**

|                            | <b>EDTA Chelation</b> |                    | <b>Placebo Infusion</b> |                    | <b>Hazard Ratio</b> | <b>95% CI</b> |
|----------------------------|-----------------------|--------------------|-------------------------|--------------------|---------------------|---------------|
|                            | <b># of Patients</b>  | <b># of Events</b> | <b># of Patients</b>    | <b># of Events</b> |                     |               |
| All Participants           | 839                   | 222 (26%)          | 869                     | 261 (30%)          | 0.82                | 0.69, 0.99    |
| High-dose Vitamins         |                       |                    |                         |                    |                     |               |
| Active                     | 421                   | 108 (26%)          | 432                     | 122 (28%)          | 0.82                | 0.63, 1.06    |
| Placebo                    | 418                   | 114 (27%)          | 437                     | 139 (32%)          | 0.83                | 0.65, 1.06    |
| Gender                     |                       |                    |                         |                    |                     |               |
| Male                       | 687                   | 186 (27%)          | 722                     | 218 (30%)          | 0.85                | 0.70, 1.03    |
| Female                     | 152                   | 36 (24%)           | 147                     | 43 (29%)           | 0.76                | 0.48, 1.18    |
| Race                       |                       |                    |                         |                    |                     |               |
| White                      | 790                   | 205 (26%)          | 815                     | 247 (30%)          | 0.80                | 0.66, 0.96    |
| Other                      | 49                    | 17 (35%)           | 54                      | 14 (26%)           | 1.33                | 0.65, 2.73    |
| Time from MI to enrollment |                       |                    |                         |                    |                     |               |
| < 2 years                  | 236                   | 67 (28%)           | 258                     | 83 (32%)           | 0.85                | 0.62, 1.17    |
| 2-5 years                  | 216                   | 48 (22%)           | 184                     | 41 (22%)           | 0.93                | 0.61, 1.41    |
| ≥ 5 years                  | 386                   | 107 (28%)          | 427                     | 137 (32%)          | 0.80                | 0.62, 1.03    |

(continued on next page)

**Table A-6**  
**SUBGROUP ANALYSES COMPARING EDTA CHELATION TO PLACEBO**  
**FOR PRIMARY ENDPOINT**

|                            | EDTA Chelation |             | Placebo Infusion |             | Hazard Ratio | 95% CI     |
|----------------------------|----------------|-------------|------------------|-------------|--------------|------------|
|                            | # of Patients  | # of Events | # of Patients    | # of Events |              |            |
| All Participants           | 839            | 222 (26%)   | 869              | 261 (30%)   | 0.82         | 0.69, 0.99 |
| High-dose Vitamins         |                |             |                  |             |              |            |
| Active                     | 421            | 108 (26%)   | 432              | 122 (28%)   | 0.82         | 0.63, 1.06 |
| Placebo                    | 418            | 114 (27%)   | 437              | 139 (32%)   | 0.83         | 0.65, 1.06 |
| Gender                     |                |             |                  |             |              |            |
| Male                       | 687            | 186 (27%)   | 722              | 218 (30%)   | 0.85         | 0.70, 1.03 |
| Female                     | 152            | 36 (24%)    | 147              | 43 (29%)    | 0.76         | 0.48, 1.18 |
| Race                       |                |             |                  |             |              |            |
| White                      | 790            | 205 (26%)   | 815              | 247 (30%)   | 0.80         | 0.66, 0.96 |
| Other                      | 49             | 17 (35%)    | 54               | 14 (26%)    | 1.33         | 0.65, 2.73 |
| Time from MI to enrollment |                |             |                  |             |              |            |
| < 2 years                  | 236            | 67 (28%)    | 258              | 83 (32%)    | 0.85         | 0.62, 1.17 |
| 2-5 years                  | 216            | 48 (22%)    | 184              | 41 (22%)    | 0.93         | 0.61, 1.41 |
| ≥ 5 years                  | 386            | 107 (28%)   | 427              | 137 (32%)   | 0.80         | 0.62, 1.03 |

(continued on next page)

555

## **Adverse Events Reported During the Trial**

556

557 The following tables (Table A-7 and Table A-8) provide additional detail to supplement the  
558 information in Table A-5 and in the manuscript. The serious and non-serious adverse events  
559 reported in the trial are individually listed, grouped by the system involved (from the MEDRA  
560 coding), and compared by infusion group.

**Table A-7**  
**Serious Adverse Events**

| <b>Events</b>                                        | <b>EDTA Chelation<br/>(N=839)</b> | <b>Placebo<br/>(N=869)</b> | <b>P-value</b> |
|------------------------------------------------------|-----------------------------------|----------------------------|----------------|
| Total                                                | 100 (12%)                         | 127 (15%)                  | 0.1009         |
| Blood and Lymphatic System Disorders                 | 0 (0%)                            | 0 (0%)                     | N/A            |
| Cardiac Disorders                                    | 33 (4%)                           | 39 (4%)                    | 0.5685         |
| Ear and Labyrinth Disorders                          | 0 (0%)                            | 0 (0%)                     | N/A            |
| Eye Disorders                                        | 0 (0%)                            | 0 (0%)                     | N/A            |
| Gastrointestinal Disorders                           | 12 (1%)                           | 12 (1%)                    | 0.9309         |
| General Disorders and Administration Site Conditions | 9 (1%)                            | 14 (2%)                    | 0.3345         |
| Hepatobiliary Disorders                              | 3 (0%)                            | 2 (0%)                     | 0.6818         |
| Immune System Disorders                              | 0 (0%)                            | 0 (0%)                     | N/A            |
| Infections and Infestations                          | 18 (2%)                           | 16 (2%)                    | 0.6527         |
| Injury, Poisoning and Procedural Complications       | 7 (1%)                            | 7 (1%)                     | 0.9474         |

(continued on next page)

**Table A-7**  
**Serious Adverse Events**

| <b>Events</b>                                   | <b>EDTA Chelation<br/>(N=839)</b> | <b>Placebo<br/>(N=869)</b> | <b>P-value</b> |
|-------------------------------------------------|-----------------------------------|----------------------------|----------------|
| Investigations                                  | 3 (0%)                            | 3 (0%)                     | 1.0000         |
| Metabolism and Nutrition Disorders              | 2 (0%)                            | 2 (0%)                     | 1.0000         |
| Musculoskeletal and Connective Tissue Disorders | 3 (0%)                            | 2 (0%)                     | 0.6818         |
| Neoplasms                                       | 7 (1%)                            | 4 (0%)                     | 0.3340         |
| Nervous System Disorders                        | 8 (1%)                            | 10 (1%)                    | 0.6899         |
| Psychiatric Disorders                           | 1 (0%)                            | 3 (0%)                     | 0.6248         |
| Renal and Urinary Disorders                     | 4 (0%)                            | 6 (1%)                     | 0.7536         |
| Reproductive System and Breast Disorders        | 0 (0%)                            | 0 (0%)                     | N/A            |
| Respiratory, Thoracic and Mediastinal Disorders | 12 (1%)                           | 21 (2%)                    | 0.1388         |
| Skin and Subcutaneous Tissue Disorders          | 0 (0%)                            | 1 (0%)                     | 1.0000         |
| Surgical and Medical Procedures                 | 1 (0%)                            | 0 (0%)                     | 0.4912         |
| Vascular Disorders                              | 4 (0%)                            | 7 (1%)                     | 0.3958         |

565

566

567

**Table A-8**  
**Non-Serious Adverse Events by Infusion Arm**

| <b>Events</b>                                        | <b>EDTA Chelation<br/>(N=839)</b> | <b>Placebo<br/>(N=869)</b> | <b>P-value</b> |
|------------------------------------------------------|-----------------------------------|----------------------------|----------------|
| Total                                                | 572 (68%)                         | 582 (67%)                  | 0.5955         |
| Blood and Lymphatic System Disorders                 | 48 (6%)                           | 37 (4%)                    | 0.1644         |
| Cardiac Disorders                                    | 47 (6%)                           | 54 (6%)                    | 0.5918         |
| Ear and Labyrinth Disorders                          | 2 (0%)                            | 4 (0%)                     | 0.6872         |
| Eye Disorders                                        | 9 (1%)                            | 5 (1%)                     | 0.2544         |
| Gastrointestinal Disorders                           | 105 (13%)                         | 124 (14%)                  | 0.2874         |
| General Disorders and Administration Site Conditions | 128 (15%)                         | 92 (11%)                   | 0.0040         |
| Hepatobiliary Disorders                              | 2 (0%)                            | 1 (0%)                     | 0.6183         |
| Immune System Disorders                              | 4 (0%)                            | 1 (0%)                     | 0.2102         |
| Infections and Infestations                          | 98 (12%)                          | 117 (13%)                  | 0.2667         |
| Injury, Poisoning and Procedural Complications       | 28 (3%)                           | 26 (3%)                    | 0.6834         |

(continued on next page)

569



**Table A-8**  
**Non-Serious Adverse Events by Infusion Arm**

| <b>Events</b>                                   | <b>EDTA Chelation<br/>(N=839)</b> | <b>Placebo<br/>(N=869)</b> | <b>P-value</b> |
|-------------------------------------------------|-----------------------------------|----------------------------|----------------|
| Investigations                                  | 198 (24%)                         | 208 (24%)                  | 0.8704         |
| Metabolism and Nutrition Disorders              | 249 (30%)                         | 223 (26%)                  | 0.0635         |
| Musculoskeletal and Connective Tissue Disorders | 70 (8%)                           | 61 (7%)                    | 0.3041         |
| Neoplasms                                       | 4 (0%)                            | 8 (1%)                     | 0.2723         |
| Nervous System Disorders                        | 64 (8%)                           | 51 (6%)                    | 0.1469         |
| Psychiatric Disorders                           | 12 (1%)                           | 16 (2%)                    | 0.5038         |
| Renal and Urinary Disorders                     | 62 (7%)                           | 89 (10%)                   | 0.0379         |
| Reproductive System and Breast Disorders        | 5 (1%)                            | 9 (1%)                     | 0.3136         |
| Respiratory, Thoracic and Mediastinal Disorders | 73 (9%)                           | 81 (9%)                    | 0.6546         |
| Skin and Subcutaneous Tissue Disorders          | 25 (3%)                           | 19 (2%)                    | 0.3008         |
| Vascular Disorders                              | 38 (5%)                           | 38 (4%)                    | 0.8755         |
